# Supplementary material
Source: Springer Nature journal article supplement (https://www.springermedizin.de/resource/supplementary/12936_2013_3027_MOESM2_ESM.pdf/9544864)
Supplement: MOESM2 [file 9544864]

**Additional file A2. Time-points for sampling schedules investigated in simulation study**

**Table A2.1 The time-points (in hours) included in each of the sampling schedules investigated in the simulation study**

| Alternative sampling schedules | 0 | 1 | 6 | 7 | 8 | 10 | 12 | 13 | 16 | 18 | 24 | 25 | and then counting every ... |            |                   |                    |             |                    |                  |
|--------------------------------|---|---|---|---|---|----|----|----|----|----|----|----|-----------------------------|------------|-------------------|--------------------|-------------|--------------------|------------------|
|                                |   |   |   |   |   |    |    |    |    |    |    |    | 6h until negative           | 6h to 48hr | 8h until negative | 12h until negative | 12h to 48hr | 24h until negative | 24 h + next hour |
| S1                             | X |   | X |   |   |    | X  |    |    | X  | X  |    | X                           |            |                   |                    |             |                    |                  |
| S2                             | X |   |   |   | X |    |    |    | X  |    | X  |    |                             |            | X                 |                    |             |                    |                  |
| S3                             | X |   |   |   |   |    | X  |    |    |    | X  |    |                             |            |                   | X                  |             |                    |                  |
| S4                             | X |   |   |   |   |    |    |    |    |    | X  |    |                             |            |                   |                    |             | X                  |                  |
| S1a                            | X |   | X |   |   |    | X  |    |    | X  | X  |    |                             | X          |                   | X                  |             |                    |                  |
| S1b                            | X |   | X |   |   |    | X  |    |    | X  | X  |    |                             | X          |                   |                    |             | X                  |                  |
| S1c                            | X |   | X |   |   |    | X  |    |    | X  | X  |    |                             | X          |                   |                    |             |                    |                  |
| S1_24                          | X |   | X |   |   |    | X  |    |    | X  | X  |    |                             |            |                   | X                  |             |                    |                  |
| S2_24                          | X |   |   |   | X |    |    |    | X  |    | X  |    |                             |            |                   | X                  |             |                    |                  |
| B1                             | X |   | X |   |   |    | X  |    |    |    | X  |    |                             |            |                   | X                  |             |                    |                  |
| M1                             | X | X |   |   |   |    |    |    |    |    | X  | X  |                             |            |                   |                    |             |                    | X                |
| M2                             |   |   | X | X |   |    |    |    |    |    | X  | X  |                             |            |                   |                    |             |                    | X                |
| M3                             |   |   |   |   |   |    | X  | X  |    |    | X  | X  |                             |            |                   |                    |             |                    | X                |
| O1                             | X |   | X |   |   | X  |    |    |    |    | X  |    |                             |            |                   |                    | X           |                    |                  |
| O1a                            | X |   | X |   |   | X  |    |    |    |    | X  |    |                             |            |                   | X                  |             |                    |                  |
| O1b                            | X |   | X |   |   | X  |    |    |    |    | X  |    |                             |            |                   |                    | X           | X                  |                  |
